# Supplementary material for: Further development of crew resource management training
Source: Springer Nature journal article supplement (doi:10.1007/s00101-022-01170-3), 2022-07-08

**Supplementary material to the article** "Further development of crew resource management training - needs assessment by means of team-work-context-analysis in teams of anaesthesia and intensive care" by Eismann H, Breuer G, Flentje M (2022) in *Die Anaesthesiologie*.

Article and supplementary material are available at [www.springermedizin.de](http://www.springermedizin.de). Please enter the article title in the search there.

### Additional Figures

*Experience in human factors and/or crew resource management on a scale from "no experience" to "very much experience".*

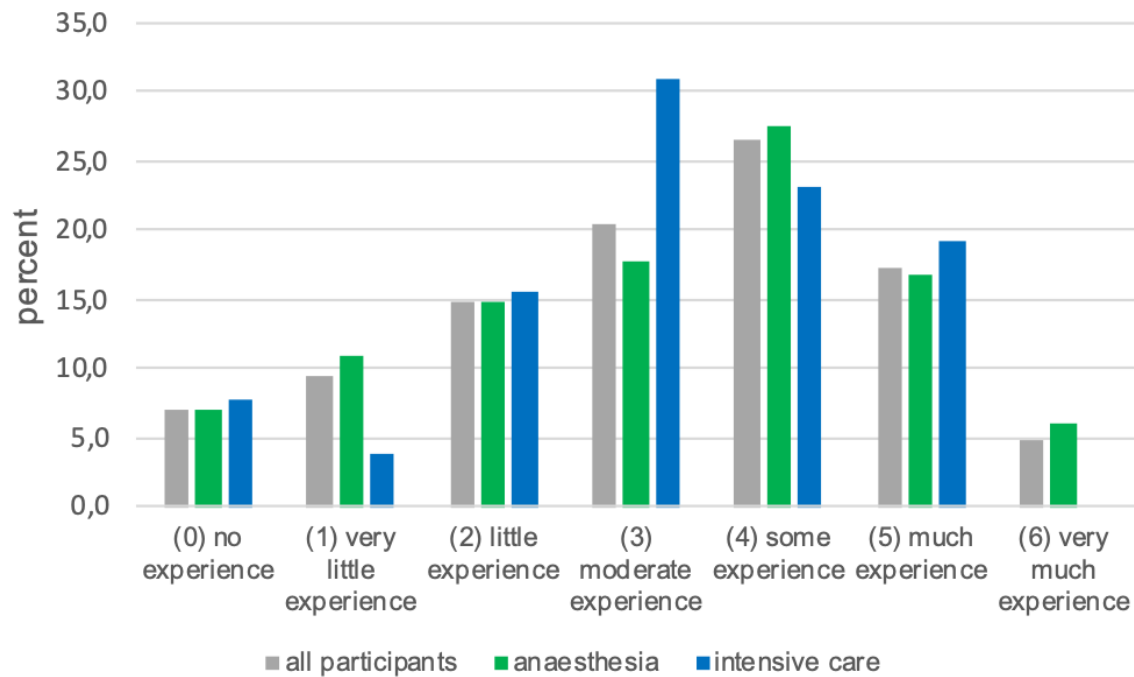

*Experience in the methodology "simulation as team training" on a scale from "no experience" to "very much experience".*

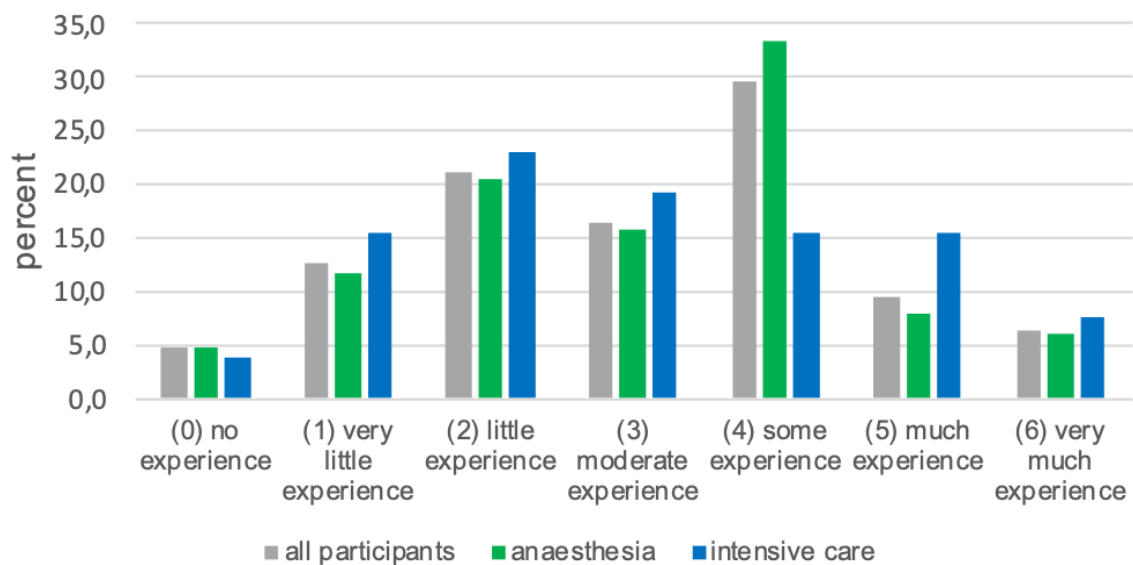

Supplement: MOESM1 [file 23251058]
