# Supplementary material for: Further development of crew resource management training
Source: Springer Nature journal article supplement (doi:10.1007/s00101-022-01170-3), 2022-07-08
Supplement: MOESM2 [file 23251058]

**Supplementary material to the article** "Further development of crew resource management training - needs assessment by means of team-work-context-analysis in teams of anaesthesia and intensive care" by Eismann H, Breuer G, Flentje M (2022) in *Die Anaesthesiologie*.

Article and supplementary material are available at [www.springermedizin.de](http://www.springermedizin.de). Please enter the article title in the search there.

### Demographic data of the participants.

|                                |                                             | frequenc | percentage |
|--------------------------------|---------------------------------------------|----------|------------|
| <b>sex</b>                     | male                                        | 57       | 44.5       |
|                                | female                                      | 69       | 53.9       |
|                                | non-binary                                  | 2        | 1.6        |
| <b>Age [years]</b>             | 20-29                                       | 21       | 16.4       |
|                                | 30- 39                                      | 41       | 32.0       |
|                                | 40-49                                       | 30       | 23.5       |
|                                | 50-59                                       | 26       | 20.3       |
|                                | 60-69                                       | 10       | 7.8        |
| <b>work experience [years]</b> | < 2                                         | 20       | 15.6       |
|                                | 2-5                                         | 15       | 11.7       |
|                                | 5-10                                        | 23       | 18         |
|                                | 10-15                                       | 15       | 11.7       |
|                                | > 15                                        | 55       | 43         |
| <b>level of hospital care</b>  | First-level hospital                        | 12       | 9.5        |
|                                | Second-level hospital                       | 7        | 5.6        |
|                                | Third-level hospital                        | 49       | 38.9       |
|                                | university hospital                         | 58       | 46.0       |
|                                | not answered                                | 2        |            |
| <b>profession</b>              | nurse (anaesthesia)                         | 7        | 5.5        |
|                                | nurse (intensive care medicine)             | 5        | 3.9        |
|                                | specialised nurse (anaesthesia)             | 13       | 10.2       |
|                                | specialised nurse (intensive care medicine) | 3        | 2.3        |
|                                | anaesthesia technician                      | 3        | 2.3        |
|                                | residents (anaesthesia)                     | 29       | 22.7       |
|                                | residents (intensive care medicine)         | 6        | 4.7        |
|                                | consultant (anaesthesia)                    | 50       | 39.1       |
|                                | consultant (intensive care medicine)        | 12       | 9.4        |
| <b>work environment</b>        | anaesthesiology                             | 102      | 79.8       |
|                                | intensive care medicine                     | 26       | 20.3       |
