# Supplementary material for: Further development of crew resource management training: Needs assessment by means of teamwork-context analysis in anesthesia and intensive care teams
Source: Anaesthesiologie. 2022 Jul 8;71(Suppl 2):180–9. doi: 10.1007/s00101-022-01170-3 (PMC9266080; doi:10.1007/s00101-022-01170-3)
Supplement: Supplementary file 3 — Questionnaire [file 101_2022_1170_MOESM3_ESM.pdf]

Supplementary material to the article "Further development of crew resource management training - needs assessment by means of team-work-context-analysis in teams of anaesthesia and intensive care" by Eismann H, Breuer G, Flentje M (2022) in Die Anaesthesiologie.

Article and supplementary material are available at [www.springermedizin.de](http://www.springermedizin.de). Please enter the article title in the search there.

### German language version of the TAKAI-questionnaire

| Question                                                                       | Answers                                                                                                                                                                                                                                                                                                                                                                                                              |
|--------------------------------------------------------------------------------|----------------------------------------------------------------------------------------------------------------------------------------------------------------------------------------------------------------------------------------------------------------------------------------------------------------------------------------------------------------------------------------------------------------------|
| Welches Geschlecht haben Sie?                                                  | [weiblich, männlich, divers]                                                                                                                                                                                                                                                                                                                                                                                         |
| Wie alt sind Sie?                                                              | [<19 Jahre, 20-29 Jahre, 30-39 Jahre, 40-49 Jahre, 50-59 Jahre, 60-69 Jahre]                                                                                                                                                                                                                                                                                                                                         |
| Bitte geben Sie Ihre Berufserfahrung in der Anästhesie und Intensivmedizin an. | [<2 Jahre, 2-5 Jahre, 5-10 Jahre, 10-15 Jahre, >15 Jahre]                                                                                                                                                                                                                                                                                                                                                            |
| Welcher Berufsgruppe gehören Sie an?                                           | [Pflegekraft in der Anästhesie, Pflegekraft in der Intensivmedizin, Fachpflegekraft in der Anästhesie, Fachpflegekraft in der der Intensivmedizin, Anästhesietechnischer Assistant/ Assistentin, Arzt/Ärztin in Weiterbildung zur Zeit in der Anästhesie, Arzt/Ärztin in Weiterbildung zur Zeit in der Intensivmedizin, Fach-/ Oberarzt zur Zeit in der Anästhesie, Fach-/ Oberarzt zur Zeit in der Intensivmedizin] |

|                                                                                                                                  |                                                                                                                                                    |
|----------------------------------------------------------------------------------------------------------------------------------|----------------------------------------------------------------------------------------------------------------------------------------------------|
| <b>Wo sind Sie beschäftigt?</b>                                                                                                  | [Praxis, Krankenhaus der Grund- und Regelversorgung, Krankenhaus der Schwerpunktversorgung, Krankenhaus der Maximalversorgung, Universitätsklinik] |
| <b>Wie schätzen Sie Ihre Erfahrung in den Bereichen „Human Factors“ und/ oder „CRM – Crew Resource Management“ ein?</b>          | [0 (keine Erfahrung) - 6 (sehr viel Erfahrung)]                                                                                                    |
| <b>Wie schätzen Sie Ihre Erfahrung in der Methodik „Simulation als Teamtraining“ ein?</b>                                        | [0 (keine Erfahrung) - 6 (sehr viel Erfahrung)]                                                                                                    |
| <b>In unserem Arbeitsfeld können Informationen, die zur Lösung einer Problemsituation benötigt werden, nicht besorgt werden.</b> | [0 (trifft nie zu) - 6 (trifft immer zu)]                                                                                                          |
| <b>Wir haben in unserer Arbeit alle Daten und Fakten, die uns helfen schnell und richtig zu entscheiden.</b>                     | [0 (trifft nie zu) - 6 (trifft immer zu)]                                                                                                          |
| <b>In Problemsituationen sind hilfreiche Informationen nicht bekannt.</b>                                                        | [0 (trifft nie zu) - 6 (trifft immer zu)]                                                                                                          |
| <b>Informationen, auf die wir uns bei Entscheidungen verlassen, stellen sich im Nachhinein als falsch heraus.</b>                | [0 (trifft nie zu) - 6 (trifft immer zu)]                                                                                                          |
| <b>Für eine erfolgreiche Erfüllung der Aufgabe ist die Zusammenarbeit von mehreren Abteilungen bei uns nötig.</b>                | [0 (trifft nie zu) - 6 (trifft immer zu)]                                                                                                          |

|                                                                                                                                                                                                          |                                           |
|----------------------------------------------------------------------------------------------------------------------------------------------------------------------------------------------------------|-------------------------------------------|
| <b>Wenn in einer Abteilung Informationen oder Materialien fehlen, hat dies auch Konsequenzen für andere Abteilungen.</b>                                                                                 | [0 (trifft nie zu) - 6 (trifft immer zu)] |
| <b>In Problemsituationen werden Informationen zwischen verschiedenen Positionsinhabern weitergegeben.</b>                                                                                                | [0 (trifft nie zu) - 6 (trifft immer zu)] |
| <b>Wenn in einer Abteilung Informationen oder Materialien fehlen, hat dies auch Konsequenzen für andere Abteilungen.</b>                                                                                 | [0 (trifft nie zu) - 6 (trifft immer zu)] |
| <b>In unserer Arbeit verändern sich Situationen auch ohne unser Handeln.</b>                                                                                                                             | [0 (trifft nie zu) - 6 (trifft immer zu)] |
| <b>Die Zeit ist ein sehr wichtiger Faktor in unserem Arbeitsfeld.</b>                                                                                                                                    | [0 (trifft nie zu) - 6 (trifft immer zu)] |
| <b>Entscheidungen müssen unter zeitlichen Begrenzungen getroffen werden.</b>                                                                                                                             | [0 (trifft nie zu) - 6 (trifft immer zu)] |
| <b>In unserem Arbeitsfeld können wir unsere Aufgaben für eine gewisse Zeit auf die Seite legen und zu einem späteren Zeitpunkt daran weiterarbeiten ohne schlimme Auswirkungen befürchten zu müssen.</b> | [0 (trifft nie zu) - 6 (trifft immer zu)] |
| <b>In unseren Handlungen zur Lösung von Problemen müssen wir gleichzeitig mehrere Ziele (Bspw. Sicherheit &amp; Schnelligkeit) berücksichtigen.</b>                                                      | [0 (trifft nie zu) - 6 (trifft immer zu)] |
| <b>Um unsere Aufgaben erfolgreich zu erfüllen, müssen wir mehrere Ziele gleichzeitig beachten.</b>                                                                                                       | [0 (trifft nie zu) - 6 (trifft immer zu)] |

|                                                                                                                                 |                                           |
|---------------------------------------------------------------------------------------------------------------------------------|-------------------------------------------|
| <b>In unserer Arbeit stehen Ziele, die zur Lösung einer Problemsituation erreicht werden müssen, miteinander in Konkurrenz.</b> | [0 (trifft nie zu) - 6 (trifft immer zu)] |
| <b>Unsere Arbeit ist durch ein Abwägen von Vorund Nachteilen für die Erreichung von verschiedenen Zielen gekennzeichnet.</b>    | [0 (trifft nie zu) - 6 (trifft immer zu)] |
| <b>In der Arbeit haben unsere Handlungen direkte Konsequenzen, so dass wir sofort wissen, was wir bewirkt haben.</b>            | [0 (trifft nie zu) - 6 (trifft immer zu)] |
| <b>Die Ergebnisse unserer Handlungen sind uns direkt danach bekannt.</b>                                                        | [0 (trifft nie zu) - 6 (trifft immer zu)] |
| <b>Auf unsere Handlungen erhalten wir sofort eine Rückmeldung.</b>                                                              | [0 (trifft nie zu) - 6 (trifft immer zu)] |
| <b>Bewegen Sie sich oder das Team während der Arbeit für eine erfolgreiche Erfüllung Ihrer Aufgaben?</b>                        | [0 (trifft nie zu) - 6 (trifft immer zu)] |
| <b>Geben Sie bitte von 0 (wie bspw. ein Fussgänger) bis 6 (wie bspw. ein Kampfflugzeug) an, wie schnell Sie sich bewegen.</b>   | 0 (Fussgänger) - 6 (Kampfflugzeug)        |
| <b>Bitte geben Sie an, aus wie vielen Personen, inklusive Ihnen selbst, Ihr Team besteht.</b>                                   | [0 (trifft nie zu) - 6 (trifft immer zu)] |
| <b>In unserer Arbeit verändern sich die Situationen, auf die wir Einfluss nehmen müssen, sehr schnell.</b>                      | [0 (trifft nie zu) - 6 (trifft immer zu)] |

|                                                                                                                          |                                           |
|--------------------------------------------------------------------------------------------------------------------------|-------------------------------------------|
| <b>n unserem Arbeitsfeld müssen wir Entscheidungen sehr schnell treffen.</b>                                             | [0 (trifft nie zu) - 6 (trifft immer zu)] |
| <b>In unserer Arbeit stellt sich eine Veränderung in den Bedingungen der Situation von jetzt auf gleich ein.</b>         | [0 (trifft nie zu) - 6 (trifft immer zu)] |
| <b>Die Zeit ist ein sehr wichtiger Faktor für Entscheidungen in unserer Arbeit.</b>                                      | [0 (trifft nie zu) - 6 (trifft immer zu)] |
| <b>In unserer Arbeit hat Hierarchie einen grossen Einfluss auf unser Verhalten.</b>                                      | [0 (trifft nie zu) - 6 (trifft immer zu)] |
| <b>In unserer Arbeit wird allen Anweisungen von Vorgesetzten Folge geleistet, komme was wolle.</b>                       | [0 (trifft nie zu) - 6 (trifft immer zu)] |
| <b>Auf die Einhaltung des Dienstweges wird in unserer Arbeit grossen Wert gelegt.</b>                                    | [0 (trifft nie zu) - 6 (trifft immer zu)] |
| <b>Während der Arbeit werden Anweisungen von oben hinterfragt, wenn das für eine Lösung der Situation bedeutend ist.</b> | [0 (trifft nie zu) - 6 (trifft immer zu)] |
| <b>In der Arbeit werden Informationen und Anmerkungen von Rangniedrigeren in die Lösungsfindung mit einbezogen.</b>      | [0 (trifft nie zu) - 6 (trifft immer zu)] |
| <b>In unserer Arbeit sind wir extremer Hitze ausgesetzt.</b>                                                             | [0 (trifft nie zu) - 6 (trifft immer zu)] |
| <b>Während der Arbeit können wir nichts oder nicht richtig sehen.</b>                                                    | [0 (trifft nie zu) - 6 (trifft immer zu)] |
| <b>In unserer Arbeit sind wir extremer Kälte ausgesetzt.</b>                                                             | [0 (trifft nie zu) - 6 (trifft immer zu)] |

|                                                                                                                                                                |                                           |
|----------------------------------------------------------------------------------------------------------------------------------------------------------------|-------------------------------------------|
| <b>Während der Arbeit müssen wir bei Dunkelheit und schlechtem Licht arbeiten.</b>                                                                             | [0 (trifft nie zu) - 6 (trifft immer zu)] |
| <b>Arbeitsumgebungen wie Gewässer oder heftiger Regen haben einen großen Einfluss auf die Erfüllung unserer Aufgabe.</b>                                       | [0 (trifft nie zu) - 6 (trifft immer zu)] |
| <b>In unserer Arbeit sind wir äußeren Bedingungen wie Sturm ausgesetzt.</b>                                                                                    | [0 (trifft nie zu) - 6 (trifft immer zu)] |
| <b>Während der Arbeit können wir mit unseren Kollegen ungehindert kommunizieren.</b>                                                                           | [0 (trifft nie zu) - 6 (trifft immer zu)] |
| <b>In Problemsituationen ist der Austausch von Informationen zwischen den handelnden Personen völlig barrierefrei.</b>                                         | [0 (trifft nie zu) - 6 (trifft immer zu)] |
| <b>Zur Lösung einer Problemsituation können wir nur so miteinander kommunizieren, dass eine vollständige Informationsübermittlung nicht gewährleistet ist.</b> | [0 (trifft nie zu) - 6 (trifft immer zu)] |
| <b>Für die Erfüllung unserer Aufgaben arbeiten wir auch an Plätzen, an denen wir noch nie zuvor gewesen sind.</b>                                              | [0 (trifft nie zu) - 6 (trifft immer zu)] |
| <b>In Problemsituationen handeln wir in einer uns vertrauten Arbeitsumgebung.</b>                                                                              | [0 (trifft nie zu) - 6 (trifft immer zu)] |
| <b>Während der Arbeit wechseln wir in eine Arbeitsumgebung, die uns unbekannt ist.</b>                                                                         | [0 (trifft nie zu) - 6 (trifft immer zu)] |
| <b>Während unserer Arbeit handeln wir an Orten, die uns vertraut sind.</b>                                                                                     | [0 (trifft nie zu) - 6 (trifft immer zu)] |

|                                                                                                                                               |                                           |
|-----------------------------------------------------------------------------------------------------------------------------------------------|-------------------------------------------|
| <b>In unserer Arbeit steht die erfolgreiche Bewältigung einer Problemsituation in direktem Zusammenhang zu unserem eigenen Überleben.</b>     | [0 (trifft nie zu) - 6 (trifft immer zu)] |
| <b>Fehler in unserer Arbeit haben Konsequenzen für unser Überleben.</b>                                                                       | [0 (trifft nie zu) - 6 (trifft immer zu)] |
| <b>Es ist wichtig die berufliche Umwelt und Technologie zu verstehen und zu wissen, wie die Teamkollegen darin agieren.</b>                   | [0 (trifft nie zu) - 6 (trifft immer zu)] |
| <b>Es ist von großer Bedeutung eine volle Kenntnis der beruflichen Ausrüstung zu haben sowie das Wissen der Kollegen darüber zu erfahren.</b> | [0 (trifft nie zu) - 6 (trifft immer zu)] |
| <b>Innerhalb des Teams ist es wichtig ein gemeinsames Verständnis über die zu erledigenden Aufgaben zu haben.</b>                             | [0 (trifft nie zu) - 6 (trifft immer zu)] |
| <b>Es ist zentral eine gemeinsame Auffassung im Team über die Strategien und Vorgehensweisen zur Erfüllung der Aufgaben zu haben.</b>         | [0 (trifft nie zu) - 6 (trifft immer zu)] |
| <b>Im Team ist es wichtig zu wissen, welche Rollen und Verantwortlichkeiten die einzelnen Mitglieder haben.</b>                               | [0 (trifft nie zu) - 6 (trifft immer zu)] |
| <b>Es ist wichtig zu wissen, wer im Team mit wem zusammenarbeitet und aufeinander angewiesen ist.</b>                                         | [0 (trifft nie zu) - 6 (trifft immer zu)] |
| <b>Das Wissen und die Fähigkeiten der Teamkollegen zu kennen ist von grosser Bedeutung.</b>                                                   | [0 (trifft nie zu) - 6 (trifft immer zu)] |

|                                                                                                                                                                           |                                           |
|---------------------------------------------------------------------------------------------------------------------------------------------------------------------------|-------------------------------------------|
| <b>Es ist wichtig die Stärken und Schwächen sowie Einstellungen der Teamkollegen zu kennen.</b>                                                                           | [0 (trifft nie zu) - 6 (trifft immer zu)] |
| <b>Es ist wichtig Informationen aus der Umwelt über die Situation und die Aufgabe zu sammeln, um bewerten zu können, wann gehandelt werden muss.</b>                      | [0 (trifft nie zu) - 6 (trifft immer zu)] |
| <b>Die erhobenen Informationen müssen in den Arbeits-/Situationskontext eingebettet und darin interpretiert werden, um zu verstehen was sie bedeuten.</b>                 | [0 (trifft nie zu) - 6 (trifft immer zu)] |
| <b>Mit den gesammelten Informationen sollte man zukünftige Situationszustände oder Probleme vorhersagen.</b>                                                              | [0 (trifft nie zu) - 6 (trifft immer zu)] |
| <b>Anstehende Aufgaben zu planen und zu priorisieren ist sehr wichtig.</b>                                                                                                | [0 (trifft nie zu) - 6 (trifft immer zu)] |
| <b>Es hilft uns Aufgaben während nicht belastenden Situationen zu priorisieren, da wir dann dieses Schema auf kritische Situationen übertragen und abarbeiten können.</b> | [0 (trifft nie zu) - 6 (trifft immer zu)] |
| <b>In kritischen Situationen tendieren wir dazu Priorisierungen von Aufgaben rückgängig zu machen und neu vorzunehmen.</b>                                                | [0 (trifft nie zu) - 6 (trifft immer zu)] |
| <b>Eine effektive Aufgabenverteilung über alle Teammitglieder ist sehr wichtig.</b>                                                                                       | [0 (trifft nie zu) - 6 (trifft immer zu)] |

|                                                                                                                                           |                                                  |
|-------------------------------------------------------------------------------------------------------------------------------------------|--------------------------------------------------|
| <p><b>In unserer Arbeit ändern wir wenn nötig die Aufgabenverteilung, so dass die Arbeitsbelastung im Team gleichverteilt bleibt.</b></p> | <p>[0 (trifft nie zu) - 6 (trifft immer zu)]</p> |
|-------------------------------------------------------------------------------------------------------------------------------------------|--------------------------------------------------|
